# Supplementary material
Source: publisher site journal article supplement (https://www.dovepress.com/get_supplementary_file.php?f=397755.xlsx)
Supplement: Supplementary file 1 [file get_supplementary_file.php]

## Sheet: Table S1
Table S1. All non-pathogenic microorganisms identified in all samples by mNGS ( exceed chosen threshold: relative abundance (RA) > 9.93% )
Sample ID	non-pathogenic microorganisms	RA of each organism
P1	None	/
P2	None	/
P3	Rothia mucilaginosa	0.150334
P4	None	/
P5	None	/
P6	Streptococcus oralis	0.145631
P7	Streptococcus oralis	0.173875
P8	None	/
P9	Streptococcus oralis	0.147716
P10	None	/
P11	None	/
P12	None	/
P13	Streptococcus oralis	0.1
P14	Rothia dentocariosa	0.16129
P15	None	/
P16	None	/
P17	Saccharomyces cerevisiae	0.2
P18	None	/
P19	None	/
P20	None	/
P21	None	/
P22	None	/
P23	None	/
P24	None	/
P25	None	/
P26	None	/
P27	None	/
P28	None	/
P29	None	/
P30	None	/
P31	None	/
P32	None	/
P33	None	/
P34	None	/
P35	None	/
P36	None	/
P37	None	/
P38	None	/
P39	Pseudomonas synxantha	0.142857
P40	None	/
N1	Neisseria subflava	0.238121
N2	Prevotella melaninogenica	0.23741
	Streptococcus salivarius	0.140288
	Veillonella parvula	0.122302
N3	Streptococcus oralis	0.187632
	Streptococcus sp.	0.13055
N4	Neisseria subflava	0.214022
	Prevotella melaninogenica	0.144465
N5	Microbacterium sp.	0.230769
	Microbacterium oxydans	0.153846
N6	Neisseria subflava	0.120633
N7	Schaalia odontolytica	0.333333
	Veillonella dispar	0.111111
N8	Gemella haemolysans	0.319124
N9	Prevotella jejuni	0.357576
N10	Streptococcus mitis	0.222222
	Streptococcus sp.	0.111111
N11	None	/
N12	Prevotella melaninogenica	0.446215
N13	Streptococcus sp.	0.175799
	Streptococcus salivarius	0.128995
	Streptococcus anginosus	0.107306
N14	Streptococcus oralis	0.166667
	Streptococcus mitis	0.166667
	Streptococcus gwangjuense	0.166667
	Prevotella sp.	0.166667
	Parvimonas micra	0.166667
	Ochrobactrum sp.	0.166667
N15	Streptococcus sp.	0.141447
	Parvimonas micra	0.115132
N16	None	/
N17	Neisseria subflava	0.287566
	Neisseria cinerea	0.153801
	Neisseria flavescens	0.104891
N18	None	/
N19	None	/
N20	Streptococcus oralis	0.519496
	Streptococcus sp.	0.205759
N21	Pseudomonas fluorescens	0.5
	Lautropia mirabilis	0.5
N22	Rothia mucilaginosa	0.150947
	Streptococcus sp.	0.125963
	Neisseria subflava	0.111597
N23	Streptococcus sp.	0.25
	Streptococcus mitis	0.25
	Streptococcus anginosus	0.25
	Neisseria subflava	0.25
Note: these microorganisms were known normal flora of the respiratory tract or skin, were not interpreted as pathogens
References
1. Dickson RP, Erb-Downward JR, Freeman CM, et al. Bacterial Topography of the Healthy Human Lower Respiratory Tract. mBio. Feb 14 2017;8(1)doi:10.1128/mBio.02287-16 2. Baraniya D, Jain V, Lucarelli R, et al. Screening of Health-Associated Oral Bacteria for Anticancer Properties in vitro. Front Cell Infect Microbiol. 2020;10:575656. doi:10.3389/fcimb.2020.575656 3. Li H, Gao H, Meng H, et al. Det…

## Sheet: Table S2
Table S2. Primers and probes used for confirmary qPCR and detailed steps of qPCR
Primers and probes used for confirmary qPCR
Species		Sequences (5'-3')	References
Acinetobacter baumannii	F	AGTTCTTGGTGGTCACTTGAAGC	Detection of pathogenic microorganisms from bloodstream infection specimens using TaqMan array card technology
	R	TTAACTCTTGTGGTTGTGGAGCA
	P	AGTTGAACCAACTCCA
Corynebacterium striatum	F	CGCCCTCGCTGCCTAATT	Direct detection of Corynebacterium striatum, Corynebacterium propinquum, and Corynebacterium simulans in sputum samples by high-resolution melt curve analysis
	R	GGAACCAGGTCAGGAACTAAACC
	P	CAGCGACGCGTGTCTGTCAGCC
Enterococcus faecium	F	GGGAAATCATGGCACCAAAT	Detection of pathogenic microorganisms from bloodstream infection specimens using TaqMan array card technology
	R	CCCATCCAGAACCAAATCGT
	P	TGGTGGCGAACCTA
Klebsiella pneumoniae	F	TGCAGATAATTCACGCCCAG	Detection of pathogenic microorganisms from bloodstream infection specimens using TaqMan array card technology
	R	ACCCGCTGGACGCCAT
	P	CGCTCATCTGTTTCGC
Legionella pneumophila	F	GTACTAATTGGCTGATTGTCTTGACC	Evaluation of TaqMan Array card (TAC) for the detection of 28 respiratory pathogens
	R	CCTGGCGATGACCTACTTTCG
	P	ACTCTTTACCAAACCTG
Mycobacterium tuberculosis	F	AACGCTTGATACAGGGAG	Evaluation of TaqMan Array card (TAC) for the detection of 28 respiratory pathogens
	R	GGCTGTGGGTAGCAGACC
	P	CGGGTCCAGATGGCTTG
Proteus mirabilis	F	ACTACCCATCAGATTATGTCAT	This study
	R	CTGTTTGAGGAAAATGCAATTTA
	P	ATTCACACCCTACCCAACATTCAT
Pseudomonas aeruginosa	F	GGCGTGGGTGTGGAAGTC	Detection of pathogenic microorganisms from bloodstream infection specimens using TaqMan array card technology
	R	TGGTGGCGATCTTGAACTTYTT
	P	TGSAGKGGARCGWCA
Staphylococcus haemolyticus	F	CAGTTGAGGGAACAGATCTTGAA	Detection of pathogenic microorganisms from bloodstream infection specimens using TaqMan array card technology
	R	CCCAGAATAATGAGTGATTTAAGTGTC
	P	TCAAACAGCTGTTCGTAATA
Stenotrophomonas maltophilia	F	GAACGCGGACTAGCCCTTAAG	Detection of pathogenic microorganisms from bloodstream infection specimens using TaqMan array card technology
	R	TCGGTCAGTAGTATTTAGCCTTGGA
	P	TAGAAGGTGATAGCCCTGTAT
Candida albicans	F	CTTGGTATTTTGCATGYTGCTCTC	Detection of pathogenic microorganisms from bloodstream infection specimens using TaqMan array card technology
	R	GTCAGAGGCTATAACACACAGCAG
	P	TGCGTTTACCGGGCCA
Candida parapsilosis	F	GATCAGACTTGGTATTTTGTATGTTACTCT	Detection of pathogenic microorganisms from bloodstream infection specimens using TaqMan array card technology
	R	CAGAGCCACATTT CTTTGCA
	P	AGTTTACCGGGCCAGCA
Herpes simplex virus 1	F	CGGCCGTGTGACACTATCG	Development of a multiplex droplet digital PCR assay for detection of enterovirus, parechovirus, herpes simplex virus 1 and 2 simultaneously for diagnosis of viral CNS infections
	R	CTCGTAAAATGGCCCCTCC
	P	CCATACCGACCACACCGACGAAC
Epstein-Barr virus	F	TGACCTCTTGCATGGCCTCT	Viral Etiology of Sporadic Cases of Parotitis among Children in Korea during 2013-2014
	R	CCTCTTTTCCAAGTCAGAATTTGAC
	P	CCATCTACCCATCCTACACTGCGCTTTACA
Detailed steps of qPCR
All qPCR tests were performed on StepOnePlus Real-Time PCR System (Thermo Fisher, USA) with TaqMan Universal PCR Master Mix. The reaction mixture consisted of 1 × Taqman universal PCR master mix (Applied Biosystems; Life Technologies), 1 μL each of reverse and forward primers (final conc. 0.4 μM), 0.5 μL FAM-MGB probe (final conc. 0.2 μM), 2 μl DNA template and nuclease-free water (Takara, 9012) …

## Sheet: Table S3
Table S3. The AST results of the 51 culture-confirmed bacterial pathogens.
Species	ID	penicillin	cephalosporin	fluoroquinolone	aminoglycoside	carbapenem	sulfonamide	tetracycline	monobactam	cephamycin	macrolide	lincosamide	polypeptide
Acinetobacter baumannii	P3	I	I	R	R	S	S	S	/	/	/	/	I
	P11	R	R	R	R	R	/	R	R	/	/	/	I
	P12	R	R	R	R	R	R	R	/	/	/	/	R
	P13	R	R	R	R	R	R	R	/	/	/	/	I
	P15	R	R	R	R	R	R	R	/	/	/	/	I
	P16	R	R	R	R	R	R	R	/	/	/	/	I
	P20	R	R	R	R	R	R	R	/	/	/	/	I
	P21	R	R	R	R	R	R	R	/	/	/	/	I
	P23	R	R	R	R	R	R	R	/	/	/	/	I
	P24	R	R	R	R	R	R	R	/	/	/	/	I
	P25	R	R	R	R	R	R	R	/	/	/	/	I
	P30	R	R	R	R	R	R	R	I	/	/	/	I
	P32	R	R	R	R	I	R	R	S	/	/	/	I
	P33	R	R	R	R	R	R	R	/	/	/	/	I
	P34	R	R	R	R	R	R	R	/	/	/	/	I
	P36	S	I	S	S	S	S	/	S	/	/	/	/
	P38	R	R	R	R	R	R	R	/	/	/	/	I
Pseudomonas aeruginosa	P1	I	R	S	S	S	/	/	/	/	/	/	/
	P5	R	R	R	R	R	R	/	/	R	/	/	I
	P6	R	R	R	R	R	/	/	/	/	/	/	/
	P9	R	R	S	S	R	/	/	/	/	/	/	I
	P10	S	S	S	S	R	/	/	/	/	/	/	I
	P13	R	R	R	R	R	/	/	/	/	/	/	I
	P19	R	R	S	S	R	R	/	/	R	/	/	I
	P24	R	R	R	S	R	/	/	/	/	/	/	I
	P25	S	S	S	S	S	/	/	/	/	/	/	I
	P35	S	S	I	S	S	/	/	/	/	/	/	/
	P37	R	R	R	R	R	R	/	/	R	/	/	/
	P38	R	R	R	R	R	/	/	/	/	/	/	/
	P40	R	R	R	R	R	R	/	/	R	/	/	I
	P21	R	R	R	R	R	/	/	/	/	/	/	I
Klebsiella pneumoniae	P9	R	R	R	R	R	R	/	R	R	/	/	/
	P18	R	R	R	R	R	R	R	R	/	/	/	I
	P28	R	R	R	R	R	R	R	R	/	/	/	I
	P31	R	R	R	R	R	S	S	R	/	/	/	I
	P32	R	R	R	R	R	R	R	R	/	/	/	I
	P35	R	R	R	I	R	R	/	R	R	/	/	/
	P36	R	R	R	I	R	S	/	R	R	/	/	/
	P40	R	R	R	I	S	R	R	R	/	/	/	I
Stenotrophomonas maltophilia	P8	/	R	S	/	/	S	S	/	/	/	/	/
	P17	/	S	S	/	/	S	S	/	/	/	/	/
Staphylococcus aureus	P27	R	/	S	I	/	R	S	/	S	R	R	S
	P29	R	/	S	S	/	S	S	/	S	R	R	S
Enterococcus faecium	P3	R	/	R	R	/	/	S	/	/	R	/	S
	P39	R	/	R	S	/	/	S	/	/	S	/	S
Proteus mirabilis	P7	R	R	R	R	S	/	R	S	S	/	/	S
	P23	R	R	R	R	S	S	/	S	S	/	/	/
Staphylococcus haemolyticus	P2	R	/	R	R	/	R	R	/	R	R	S	S
Burkholderia contaminans	P22	R	R	R	R	S	S	I	/	/	/	/	/
Burkholderia gladioli	P27	/	I	S	S	S	S	/	/	/	/	/	/
Morganella morganii	P20	R	R	S	S	I	S	R	S	/	/	/	/
Count		42	39	38	33	32	26	22	9	8	4	2	1
Note: R, resistant; I, intermediate; S, susceptible; /, no detection

## Sheet: Table S4
Table S4. Detailed information of bacterial and fungal pathogens detection result by mNGS testing.
Sample ID	Culture Results	Nanopore Results						Gold standard		Composite standard
		Pathogen Species	Total reads after barcode trimming	Total microbe reads	Target Pathogen Reads	RPM	RA	Comparison to Culture	Score	QPCR(CT < 35)	Clinical adjudication	Comparison to Composite standard	Score
P1	Pseudomonas aeruginosa	Pseudomonas aeruginosa	16292	27	24	0.00147312	0.888889	TP	1		Pseudomonas aeruginosa	TP	1
P2	Staphylococcus haemolyticus	Staphylococcus haemolyticus	55802	382	66	0.00118275	0.172775	TP	1		Staphylococcus haemolyticus	TP	1
		Legionella sp.			241	0.00431884	0.63089			-
P3	Enterococcus faecium	Enterococcus faecium	61410	898	435	0.00708354	0.48441	TP	0.5		Enterococcus faecium	TP	1
	Acinetobacter baumannii	Acinetobacter baumannii			26	0.000423384	0.0289532	FN		-
P4	Candida albicans	Candida albicans	48393	24	21	0.000433947	0.875	TP	1		Candida albicans	TP	1
P5	Pseudomonas aeruginosa	Pseudomonas aeruginosa	62563	2063	1625	0.0259738	0.787688	TP	1		Pseudomonas aeruginosa	TP	1
		Stenotrophomonas maltophilia			301	0.00481115	0.145904			+	Stenotrophomonas maltophilia
P6	Pseudomonas aeruginosa	Pseudomonas aeruginosa	29527	103	43	0.00145629	0.417476	TP	1		Pseudomonas aeruginosa	TP	1
		Stenotrophomonas maltophilia			19	0.000643479	0.184466			+	Stenotrophomonas maltophilia	TP
		Corynebacterium striatum			16	0.000541877	0.15534			+	Corynebacterium striatum	TP
P7	Proteus mirabilis	Pseudomonas aeruginosa	52484	1133	309	0.00588751	0.272727	FN	0	+	Pseudomonas aeruginosa	TP	2/3
		Corynebacterium striatum			276	0.00525875	0.243601			+	Corynebacterium striatum	TP
		Proteus mirabilis			44	0.000838351	0.0215875			+	Proteus mirabilis	FN
P8	Stenotrophomonas maltophilia	Stenotrophomonas maltophilia	88223	32	27	0.000306043	0.84375	TP	1		Stenotrophomonas maltophilia	TP	1
P9	Pseudomonas aeruginosa	Pseudomonas aeruginosa	14826	5145	1598	0.107784	0.310593	TP	1		Pseudomonas aeruginosa	TP	1
	Klebsiella pneumoniae	Klebsiella pneumoniae			880	0.0593552	0.17104				Klebsiella pneumoniae	TP
P10	Pseudomonas aeruginosa	Pseudomonas aeruginosa	31934	94	42	0.00131521	0.446809	TP	1		Pseudomonas aeruginosa	TP	1
		Acinetobacter baumannii			30	0.000939438	0.319149			+	Acinetobacter baumannii	TP
P11	Acinetobacter baumannii	Acinetobacter baumannii	73515	1672	1184	0.0161056	0.708134	TP	1		Acinetobacter baumannii	TP	1
P12	Acinetobacter baumannii	Acinetobacter baumannii	10984	618	594	0.0540787	0.961165	TP	1		Acinetobacter baumannii	TP	1
P13	Pseudomonas aeruginosa	Pseudomonas aeruginosa	8873	180	115	0.0129607	0.638889	TP	1		Pseudomonas aeruginosa	TP	1
	Acinetobacter baumannii	Acinetobacter baumannii			20	0.00225403	0.111111	TP			Acinetobacter baumannii	TP
P14	Candida albicans	Candida albicans	44999	31	10	0.000222227	0.322581	TP	1		Candida albicans	TP	1
P15	Acinetobacter baumannii	Acinetobacter baumannii	104946	677	604	0.00575534	0.892171	TP	1		Acinetobacter baumannii	TP	1
P16	Acinetobacter baumannii	Acinetobacter baumannii	68134	11471	11284	0.165615	0.983698	TP	0.5		Acinetobacter baumannii	TP	1
	Candida albicans	Candida albicans			0	0	0	FN		-
P17	Stenotrophomonas maltophilia	Stenotrophomonas maltophilia	41245	5	4	9.69815e-05	0.8	TP	1		Stenotrophomonas maltophilia	TP	1
P18	Klebsiella pneumoniae	Klebsiella pneumoniae	64308	28454	26423	0.410882	0.928622	TP	1		Klebsiella pneumoniae	TP	1
P19	Pseudomonas aeruginosa	Pseudomonas aeruginosa	40001	10276	10035	0.250869	0.976547	TP	1		Pseudomonas aeruginosa	TP	1
P20	Acinetobacter baumannii	Acinetobacter baumannii	78306	7185	5492	0.0701351	0.76437	TP	1		Acinetobacter baumannii	TP	1
	Morganella morganii	Morganella morganii			794	0.0101397	0.110508	TP			Morganella morganii	TP
P21	Acinetobacter baumannii	Acinetobacter baumannii	10773	100	70	0.00649773	0.7	TP	1		Acinetobacter baumannii	TP	1
	Pseudomonas aeruginosa	Pseudomonas aeruginosa			21	0.00194932	0.21	TP			Pseudomonas aeruginosa	TP
P22	Burkholderia contaminans	Burkholderia contaminans	29331	40	5	0.000170468	0.125	TP	1		Burkholderia contaminans	TP	1
		Klebsiella pneumoniae			20	0.000681872	0.5			+	Klebsiella pneumoniae	TP
P23	Acinetobacter baumannii	Acinetobacter baumannii	97861	5397	2639	0.0269668	0.488975	TP	1		Acinetobacter baumannii	TP	1
		Pseudomonas aeruginosa			850	0.00868579	0.157495			+	Pseudomonas aeruginosa	TP
	Proteus mirabilis	Proteus mirabilis			823	0.00840989	0.152492	TP			Proteus mirabilis	TP
		Klebsiella pneumoniae			810	0.00827705	0.150083			+	Klebsiella pneumoniae	TP
P24	Acinetobacter baumannii	Acinetobacter baumannii	25935	95	43	0.00165799	0.452632	TP	1		Acinetobacter baumannii	TP	1
	Pseudomonas aeruginosa	Pseudomonas aeruginosa			30	0.00115674	0.315789	TP			Pseudomonas aeruginosa	TP
		Stenotrophomonas maltophilia			20	0.000771159	0.210526			+	Stenotrophomonas maltophilia	TP
P25	Acinetobacter baumannii	Acinetobacter baumannii	17805	189	141	0.00791912	0.746032	TP	1		Acinetobacter baumannii	TP	1
	Pseudomonas aeruginosa	Pseudomonas aeruginosa			26	0.00146026	0.137566	TP			Pseudomonas aeruginosa	TP
P26	Corynebacterium striatum	Corynebacterium striatum	29576	69	14	0.000473357	0.202899	TP	1		Corynebacterium striatum	TP	1
P27	Staphylococcus aureus	Staphylococcus aureus	73067	31	21	0.000287407	0.677419	TP	1		Staphylococcus aureus	TP	1
	Burkholderia gladioli	Burkholderia gladioli			7	9.58025e-05	0.225806	TP			Burkholderia gladioli	TP
P28	Klebsiella pneumoniae	Klebsiella pneumoniae	92826	435	380	0.00409368	0.873563	TP	1		Klebsiella pneumoniae	TP	1
P29	Staphylococcus aureus	Staphylococcus aureus	132642	1169	960	0.00723753	0.821215	TP	1		Staphylococcus aureus	TP	1
P30	Acinetobacter baumannii	Acinetobacter baumannii	24569	384	383	0.0155888	0.997396	TP	1		Acinetobacter baumannii	TP	1
P31	Klebsiella pneumoniae	Klebsiella pneumoniae	31326	184	130	0.00414991	0.706522	TP	1		Klebsiella pneumoniae	TP	1
	Corynebacterium striatum	Corynebacterium striatum			23	0.000734214	0.125	TP			Corynebacterium striatum	TP
P32	Acinetobacter baumannii	Acinetobacter baumannii	36339	494	445	0.0122458	0.90081	TP	0.5		Acinetobacter baumannii	TP	0.5
	Klebsiella pneumoniae	Klebsiella pneumoniae			23	0.000632929	0.0465587	FN		+	Klebsiella pneumoniae	FN
P33	Acinetobacter baumannii	Acinetobacter baumannii	58711	14	10	0.000170326	0.714286	TP	1		Acinetobacter baumannii	TP	1
		Candida parapsilosis			2	3.40652e-05	0.142857			+	Candida parapsilosis	TP
P34	Acinetobacter baumannii	Acinetobacter baumannii	56363	4951	4583	0.0813122	0.925672	TP	1		Acinetobacter baumannii	TP	1
P35	Klebsiella pneumoniae	Klebsiella pneumoniae	67679	145	0	0	0	FN	0.5	-	Pseudomonas aeruginosa	TP	1
	Pseudomonas aeruginosa	Pseudomonas aeruginosa			99	0.00146279	0.682759	TP
		Stenotrophomonas maltophilia			24	0.000354615	0.165517			+	Stenotrophomonas maltophilia	TP
		Acinetobacter baumannii			16	0.00023641	0.110345			+	Acinetobacter baumannii	TP
P36	Klebsiella pneumoniae	Klebsiella pneumoniae	47147	442	229	0.00485715	0.5181	TP	1		Klebsiella pneumoniae	TP	1
	Acinetobacter baumannii	Acinetobacter baumannii			70	0.00148472	0.158371	TP			Acinetobacter baumannii	TP
P37	Pseudomonas aeruginosa	Pseudomonas aeruginosa	71099	16134	13616	0.191508	0.843932	TP	1		Pseudomonas aeruginosa	TP	1
P38	Acinetobacter baumannii	Acinetobacter baumannii	43353	390	312	0.00719673	0.8	TP	1		Acinetobacter baumannii	TP	1
	Pseudomonas aeruginosa	Pseudomonas aeruginosa			64	0.00147625	0.164103	TP			Pseudomonas aeruginosa	TP
P39	Aspergillus fumigatus	Aspergillus fumigatus	66181	7	3	4.53302e-05	0.428571	TP	1		Aspergillus fumigatus	TP	1
	Enterococcus faecium	Enterococcus faecium			2	3.02202e-05	0.285714	TP			Enterococcus faecium	TP
P40	Pseudomonas aeruginosa	Pseudomonas aeruginosa	101086	45186	36659	0.362652	0.811291	TP	0.5		Pseudomonas aeruginosa	TP	2/3
		Stenotrophomonas maltophilia			4973	0.0491957	0.110056			+	Stenotrophomonas maltophilia	TP
	Klebsiella pneumoniae	Klebsiella pneumoniae			1601	0.015838	0.0354313	FN		+	Klebsiella pneumoniae	FN
N1	Negative	Haemophilus parainfluenzae	120543	15026	309	0.0025634	0.0205644	TN	1		Negative	TN	1
N2	Negative	Staphylococcus aureus	127158	278	1	7.86423e-06	0.00359712	TN	1		Negative	TN	1
N3	Negative	Streptococcus pneumoniae	25713	1892	10	0.000388908	0.00528541	TN	1		Negative	TN	1
N4	Negative	Haemophilus parainfluenzae	91947	5420	130	0.00141386	0.0239852	TN	1		Negative	TN	1
N5	Negative	/	80527	13	/	0	0	TN	1		Negative	TN	1
N6	Negative	Haemophilus parainfluenzae	88763	15601	660	0.00743553	0.042305	TN	1		Negative	TN	1
N7	Negative	Klebsiella pneumoniae	85632	90	1	1.16779e-05	0.0111111	TN	1		Negative	TN	1
N8	Negative	Haemophilus parainfluenzae	116492	10087	201	0.00172544	0.0199266	TN	1		Negative	TN	1
N9	Negative	Haemophilus parainfluenzae	46796	165	7	0.000149585	0.0424242	TN	1		Negative	TN	1
N10	Negative	Mycobacterium tuberculosis	82954	45	16	0.000192878	0.355556	FP	0	+	Mycobacterium tuberculosis	TP	1
N11	Negative	Acinetobacter baumannii	81704	124	58	0.00070988	0.467742	FP	0	+	Acinetobacter baumannii	TP	1
N12	Negative	Streptococcus pneumoniae	30268	251	7	0.000231267	0.0278884	TN	1		Negative	TN	1
N13	Negative	Streptococcus pneumoniae	79498	876	15	0.000188684	0.0171233	TN	1		Negative	TN	1
N14	Negative	/	61264	6	0	0	0	TN	1		Negative	TN	1
N15	Negative	Streptococcus pneumoniae	20717	304	4	0.000193078	0.0131579	TN	1		Negative	TN	1
N16	Negative	Staphylococcus haemolyticus	88282	193	106	0.0012007	0.549223	FP	0	+	Staphylococcus haemolyticus	TP	1
		Enterococcus faecium			74	0.000838223	0.38342	FP		+	Enterococcus faecium	TP
N17	Negative	Haemophilus parainfluenzae	81523	1697	74	0.000907719	0.0436064	TN	1		Negative	TN	1
N18	Negative	Acinetobacter baumannii	46391	3959	3814	0.0822142	0.963375	FP	0	+	Acinetobacter baumannii	TP	1
N19	Negative	Legionella pneumophila	137243	1058	1008	0.00734464	0.952741	FP	0	+	Legionella pneumophila	TP	1
N20	Negative	Klebsiella pneumoniae	27410	1667	147	0.00536301	0.0881824	TN	1		Negative	TN	1
N21	Negative	/	31305	2	0	0	0	TN	1		Negative	TN	1
N22	Negative	Haemophilus parainfluenzae	85549	4803	231	0.00270021	0.0480949	TN	1		Negative	TN	1
N23	Negative	/	33790	4	0	0	0	TN	1		Negative	TN	1

## Sheet: Table S5
Table S5. Detailed information of False-negatvie and False-positive results.
False-negative results
Compared to gold standard		Compared to composite standard
Microbe	Sample ID	Microbe	Sample ID
Acinetobacter baumannii	P3
Proteus mirabilis	P7	Proteus mirabilis	P7
Candida albicans	P16
Klebsiella pneumoniae	P32	Klebsiella pneumoniae	P32
Klebsiella pneumoniae	P35
Klebsiella pneumoniae	P40	Klebsiella pneumoniae	P40
False-positive results
Compared to gold standard		Compared to composite standard
Microbe	Sample ID	Microbe	Sample ID
Mycobacterium tuberculosis	N10
Acinetobacter baumannii	N11
Staphylococcus haemolyticus	N16
Enterococcus faecium
Acinetobacter baumannii	N18
Legionella pneumophila	N19

## Sheet: Table S6
Table S6-1. Results of viral pathogens detected by mNGS.
Sample ID	Nanopore Results		QPCR(CT < 35)
	Pathogen Species	Virus Reads
P2	EBV	3	+
P18	EBV	11	+
P19	EBV	9	+
P37	EBV	5	+
N18	EBV	15	+
	HSV-1	10	+
P5	HSV-1	28	+
P9	HSV-1	1	+
P10	HSV-1	13	+
P13	HSV-1	8	+
P15	HSV-1	59	+
P26	HSV-1	40	+
P34	HSV-1	14	+
N11	HSV-1	1	-
Table S6-2. Clinical respiratory virus test results.
Sample ID	Clinical respiratory virus results
	HRV	RSV	HSV-1	HSV-2	Influenza virus A
P2	Negative	Negative	/	/	/
P4	/	/	Negative	Negative	/
N13	Negative	Negative	Negative	Negative	/
N15	Negative	Negative	/	/	Negative
N19	/	/	Negative	Negative	Negative
Note: /, no detection
Abbreviations: EBV, Epstein-Barr virus; HRV, Human rhinovirus; RSV, Respiratory Syncytial Virus; HSV-1, Herpes simplex virus 1; HSV-2, Herpes simplex virus 2

## Sheet: Table S7
Table S7. Clinical characteristics of patients and turnaround time of samples by mNGS and routine culture, respectively.
Sample ID	Clinical characteristics of patients														Sequencing time			turnaround time of culture, h
	Age	Gender	WBC, x109/L	Percentage of neutrophils, %	CRP, mg/L	PCT, ng/mL	Length of the mechanical ventilation treatment before sampling, days	ICU outcome	Diabetes	COPD	Malignancy	Cardiovascular disease	Chronic liver disease	Chronic renal disease	Output first fastq file, min	Sequencing duration, h	turnaround time of mNGS, h
P1	56	female	10.1	79.7	64.7	0.18	7	death			1				4	0.783333	3.86333	87
P2	18	male	14.57	93.5	50.4	0.46	6	improve							5	0.833333	3.91333	95
P3	74	female	7.2	40.6	3.7	0.02	3	improve				1			6	1.33333	4.41333	91
P4	56	male	17.2	96.8	56.6	0.06	7	death	1		1				6	1.33333	4.41333	75
P5	91	male	8.84	88.4	118	0.18	18	death				1			6	1.35	4.43	66
P6	91	female	8.7	78.8	30.8	0.18	76	improve				1			9	1.25	4.33	95
P7	79	male	6.4	66.8	29.5	0.02	28	improve							7	1.86667	4.94667	73
P8	70	female	8.56	55.4	50.7	0.1	7	improve			1	1			22	1.7	4.78	71.5
P9	81	male	19.4	76.5	29	0.13	7	death				1		1	20	1.7	4.78	73
P10	69	female	31.7	95.4	17.1	0.12	12	improve			1				13	1.88333	4.96333	72.5
P11	86	male	7.48	63.5	16.9	0.05	5	improve							6	1.9	4.98	72.5
P12	97	male	7.35	52.6	30.1	0.37	5	improve						1	40	1.78333	4.86333	73
P13	86	male	10.71	78.8	62.3	0.17	6	improve			1	1		1	53	1.95	5.03	65
P14	74	female	8.86	90.2	13.4	0.3	3	improve	1			1			9	1.35	4.43	88
P15	78	male	8.27	86	188.7	0.32	2	death	1			1			20	1.63333	4.71333	49.5
P16	95	male	17.28	96.5	262.1	6	5	improve	1			1			6	1.35	4.43	75
P17	97	male	5.14	75.6	21.9	0.18	8	improve	1			1			4	0.783333	3.86333	72
P18	86	male	7.37	80.7	15.2	0.02	4	death		1		1			5	1.33333	4.41333	64
P19	25	male	23.34	91.6	201.1	2.44	5	death			1				15	2.36667	5.44667	97
P20	69	male	10.2	81	111.5	0.04	4	improve	1		1	1			13	1.91667	4.99667	96
P21	98	male	7.52	67.5	61.8	0.46	29	death							55	2.41667	5.49667	96
P22	74	female	8.22	92.1	299	5.89	2	improve	1			1			20	2.38333	5.46333	88
P23	98	male	30.77	93.5	196.6	6.01	4	death						1	2	0.9	3.98	66
P24	70	female	7.01	76.7	44.9	0.03	19	improve			1				7	0.883333	3.96333	89
P25	87	male	7.39	88.5	53.5	0.01	2	death			1				32	2.36667	5.44667	72
P26	76	male	9.12	75.6	39.6	0.03	4	improve							39	1.91667	4.99667	72
P27	35	male	10.05	92.1	270.8	0.07	6	improve							14	1.9	4.98	118
P28	86	male	7.66	87	160.7	0.65	10	death		1		1			10	1.88333	4.96333	72
P29	51	male	11.9	83.8	89.7	0.37	3	improve				1			1	0.883333	3.96333	72
P30	70	male	10.75	86.3	185.5	0.34	4	death	1		1		1		8	0.9	3.98	64
P31	76	male	5.89	56.7	46.2	0.07	4	improve							6	0.516667	3.59667	70
P32	87	male	19.94	86.5	221.2	2.03	8	death			1	1		1	7	0.616667	3.69667	68
P33	64	male	4.2	86.4	62.7	0.42	3	death			1				4	1.03333	4.11333	64
P34	64	male	2.17	82.9	84.7	0.1	9	death			1				6	1.4	4.48	92
P35	70	male	2.31	72.3	165.7	1.87	21	death	1		1		1	1	5	1.4	4.48	112
P36	73	male	8.1	83.7	43.2	0.02	3	improve							7	1.4	4.48	96
P37	58	female	1	75.5	38.6	2.88	9	death	1		1		1		2	0.666667	3.74667	72
P38	64	male	1.74	84.5	51	0.03	12	death			1				7	1.38333	4.46333	93
P39	90	male	36.02	97.8	160.3	0.81	2	death			1				5	1.4	4.48	70
P40	88	male	8.98	68.4	296.9	2.51	14	death				1			3	1.05	4.13	96
N1	61	male	5.2	62.8	49.4	0.02	4	improve							2	1	4.08	46
N2	64	male	3.3	69.2	55.9	0.02	9	improve			1	1			2	1	4.08	68
N3	80	male	9.3	85.8	56.5	0.03	5	improve			1	1			8	1.33333	4.41333	64
N4	65	female	4.6	51.4	37.3	0.02	5	improve	1			1			3	1.33333	4.41333	70
N5	61	female	13.1	95.3	6.2	26.59	6	improve			1	1			7	0.883333	3.96333	71
N6	58	female	5.25	39.8	26.9	0.02	4	improve							4	1.35	4.43	48
N7	63	male	7.1	78.3	15.6	0.02	7	improve				1			12	1.88333	4.96333	64
N8	65	male	6.3	53.2	67.9	0.02	3	improve		1	1				2	1.31667	4.39667	71
N9	23	female	12.56	79.2	33.8	0.02	12	improve							11	1.8	4.88	71
N10	60	male	9.74	95.3	93	0.23	3	improve			1				20	1.7	4.78	43.5
N11	54	female	4.34	81.3	25.3	0.02	2	improve			1				24	1.7	4.78	72.5
N12	32	male	9.69	79.7	144.8	0.14	3	improve							13	1.88333	4.96333	72
N13	61	female	22.8	47.2	56.7	0.18	4	death				1			24	1.63333	4.71333	50.5
N14	67	male	5.21	74.8	137.5	0.02	3	improve			1				4	1	4.08	74
N15	58	male	10.8	84.7	219.6	0.2	4	improve			1				3	0.783333	3.86333	73
N16	87	male	5	69.8	30.9	0.73	3	death			1				6	2.35	5.43	73
N17	35	male	10.69	95.9	47.6	0.03	2	improve							6	2.35	5.43	107
N18	67	male	11.94	92	51.1	0.63	3	improve			1				23	1.91667	4.99667	64
N19	64	male	0.13	30.7	319.8	16.48	3	death				1		1	2	0.616667	3.69667	55
N20	73	female	2.19	82.2	19.1	0.24	3	improve	1		1				5	0.583333	3.66333	72
N21	64	male	4.5	79.4	42.9	0.43	3	death			1				5	0.666667	3.74667	64
N22	52	female	2.3	83.1	12.8	0.89	2	improve			1				2	0.683333	3.76333	85
N23	60	female	7.97	71.6	110.4	0.02	2	improve							10	1.4	4.48	64
Abbreviations: WBC, White blood cell count; CRP, C-reactive protein; PCT, Procalcitonin; COPD, chronic obstructive pulmonary disease
